# Supplementary material
Source: publisher site journal article supplement (https://www.dovepress.com/article/supplementary_file/530153/Supplementary%20file%201_1.docx)
Supplement: Supplementary file 1 [file Supplementary%20file%201_1.docx]

**Questionnaire for Cleaning, Disinfection, and Functional Tests for Bag Valve Masks**

Dear Central Sterile Supply Department (CSSD) managerial personnel,

The cleaning, disinfection, and functional tests for bag valve masks are very important. This questionnaire was designed to investigate the status quo of bag valve mask reprocessing by central sterile supply departments of hospitals across all levels in China. If a hospital has only one campus, the questionnaire should be completed by one of its CSSD managerial personnel. If a hospital has two or more campuses, one of the CSSD managerial personnel from each campuses shall fill in the separate questionnaire for respective campuses. The results of this survey are intended solely for research purposes. The data are kept confidential and will not be used for any other purposes. Please feel free to fill in the information truthfully.

**Part I Basic information**

Please select the option that best suits the actual situation of the healthcare institution where you are working in.

1. Which city do you live in? [Please fill in the blank] *

_________________________________

1. What is the full name of the hospital you work for? [Please fill in the blank] *

_________________________________

1. Classification of the hospital: [Single-choice question] *

| ○ Tertiary Grade A hospital |
| --- |
| ○ Tertiary Grade B hospital |
| ○ Secondary Grade A hospital |
| ○ Secondary Grade B hospital |
| ○ Primary hospital |
| ○ Other _________________ * |

1. Nature of the hospital [Single-choice question] *

| ○ Public hospital |
| --- |
| ○ Military hospital |
| ○ Private hospital |
| ○ The third-party healthcare institution (Please skip to Question 8) |

1. Type of the hospital [Single-choice question] *

| ○ General hospital |
| --- |
| ○ Specialized hospital (obstetrics and gynecology, children, ophthalmology, oral medicine, traditional Chinese medicine, and others) |

1. The number of hospital beds [Please fill in the blank] *

_________________________________

1. Does the CSSD of your hospital outsource bag valve mask reprocessing to the third-party healthcare institutions? [Single-choice question] *

| ○ Yes (Please skip to the end of the questionnaire and submit your responses) |
| --- |
| ○ No |

1. Who are the reprocessing personnel for bag valve masks in the CSSD you work in? [Multiple-choice question] *

| □ Nurses |
| --- |
| □ Technical workers |
| □ Other _________________* |

**Part II Status quo of bag valve mask reprocessing**

Please select the option that best reflects the actual situation of the CSSD you work in.

1. Place of bag valve mask reprocessing [Single-choice question] *

| ○ Collected and reprocessed at central sterile supply department |
| --- |
| ○ Reprocessed at clinical departments (Please skip to the end of the questionnaire and submit your responses) |

1. Types of bag valve masks reprocessed by the CSSD of your hospital [Multiple-choice question] *

| □ Infant bag valve masks |
| --- |
| □ Child bag valve masks |
| □ Adult bag valve masks |

1. Are bag valve masks collected from clinical departments after use being stored separately from other devices? [Single-choice question] *

| ○ Yes |
| --- |
| ○ No |

1. Cleaning methods for bag valve masks [Multiple-choice question] *

| □ Manual cleaning |
| --- |
| □ Automatic spraying cleaning and disinfection machine and cleaning racks |
| □ Vacuum boiling cleaning and disinfection machine |
| □ Other _________________* |

1. Are components of bag valve masks completely disassembled before cleaning (For example, remove exhalation valve, intake value, and self-inflating bag from the bag valve mask) [Single-choice question] *

| ○ Complete disassembly |
| --- |
| ○ Partial disassembly  Reasons for not being disassembled completely: _________________ * |
| ○ Not disassembled |

1. Are cavities of bag valve masks (such as cavities of the mask, self-inflating bag, and oxygen reservoir bag) cleaned during the manual cleaning? [Single-choice question] *

| ○ Yes |
| --- |
| ○ No |

1. Disinfection methods for bag valve masks [Multiple-choice question] *

| □ Moist heat disinfection (Please skip to Question 9) |
| --- |
| □ Chemical disinfection (high-level disinfection)  Disinfectant used: _________________* (Please skip to Question 9) |
| □ Chemical disinfection (intermediate-level disinfection)  Disinfectant used: _________________* |

1. Are bag valve masks sterilized after intermediate-level disinfection? [Single-choice question]*

| ○ Yes |
| --- |
| ○ No |

9. Drying methods for bag valve masks after cleaning [Multiple-choice question] *

| □ Air gun |
| --- |
| □ Cleaning and disinfection machine |
| □ High-temperature drying cabinets |
| □ Low-temperature vacuum drying cabinets |
| □ Wiping |
| □ Natural drying |
| □ Other _________________* |

10.What are the requirements for hand hygiene for inspection of the packaging of bag valve masks which undergo high-level disinfection but are not sterilized? [Multiple-choice question] *

| □ 7 steps of hand hygiene technique |
| --- |
| □ Hand sanitizer |
| □ Cleaning gloves |
| □ Sterile gloves |
| □ No hand hygiene measures are adopted |
| □ Other _________________* |

1. How to clean the packaging workbench before inspecting the packaging of bag valve masks which undergo high-level disinfection but are not sterilized)? [Multiple-choice question] *

| □ Wipe the workbench with clean water |
| --- |
| □ Wipe the workbench with 75% alcohol disinfectant, chlorine-containing disinfectant, or antiseptic wipes. |
| □ Spread a sterile sheet over the workbench |
| □ Spread a clean tablecloth over the workbench |
| □ Not cleaned |
| □ Other _________________* |

12. How familiar are you with functional testing methods for bag valve masks? [Single-choice question] *

| ○ Very familiar |
| --- |
| ○ Somewhat familiar |
| ○ Not at all familiar |

1. Do you perform functional tests on bag valve masks? [Single-choice question] *

| ○ Focus on appearance intactness, but no functional tests (Please skip to Question 23) |
| --- |
| ○ Focus on appearance intactness and perform functional tests |

1. Which components of bag valve masks do you perform functional tests on? [Multiple-choice question] *

| □ Fish-mouth valve (one-way valve) |
| --- |
| □ Intake valve |
| □ Pop-off valve |
| □ Exhalation valve |
| □ Air-inlet reservoir valve |
| □ Air-outlet valve |
| □ Reusable oxygen in-let tubing (folded or aging) |
| □ Reusable oxygen reservoir bag |

1. What are packaging materials for bag valve masks? [Multiple-choice question] *

| □ Medical self-sealing pouches |
| --- |
| □ Medical paper-plastic pouches |
| □ Clean plastic bags |
| □ Medical paper pouches |
| □ Other _________________* |

1. What sterilization methods are used for bag valve masks? [Multiple-choice question] *

| □ Steam sterilization |
| --- |
| □ Ethylene oxide sterilization |
| □ Low-temperature vaporized hydrogen peroxide sterilization |
| □ Low-temperature steam and formaldehyde sterilization |
| □ Not sterilized |

1. Why do bag valve masks need to be sterilized? [Multiple-choice question] *

| □ Patients infected with special pathogens |
| --- |
| □ Required by storage duration |
| □ Required by clinical departments |
| □ Other _________________* |

1. How long is the storage duration of bag valve masks reprocessed using high-level disinfection? [Single-choice question] *

| ○ 7 days  Reasons: _________________ * |
| --- |
| ○ 14 days  Reasons: _________________ * |
| ○ 1 month  Reasons: _________________ * |
| ○ 3 months  Reasons: _________________ * |
| ○ No expiration date  Reasons: _________________ * |
| ○ Other _________________ * |

1. Do storage conditions (such as temperature, humidity, and cleanliness) of bag valve masks in clinical departments meet requirements? [Single-choice question] *

| ○ Not prioritized in practice |
| --- |
| ○ Fully met requirements |
| ○ Partially met requirements |

1. Have clinical department or nosocomial infection control department staff give feedback regarding cleaning failures in bag valve masks? [Single-choice question] *

| ○ Yes |
| --- |
| ○ No |

1. Have clinical department staff given feedback regarding malfunctions in bag valve masks? [Single-choice question] *

| ○ Yes |
| --- |
| ○ No |

1. Is a random inspection (calculating colony counts using microbiological culture) of disinfection effect conducted regularly in bag valve masks? [Single-choice question] *

| ○ No (Please skip to Question 24) |
| --- |
| ○ Yes  The random inspections are conducted by: _________________ * |

1. Are cases with disinfection failures identified during a random inspection? [Single-choice question] *

| ○ No |
| --- |
| ○ Yes |

1. What is the rational for the cleaning and disinfection methods for bag valve masks reprocessed by the CSSD you work at? [Multiple-choice question] *

| □ Work experience |
| --- |
| □ Product manuals from the manufacturers of bag valve masks |
| □ Guidelines |
| □ Other _________________* |

1. Are there standard operating procedures and quality criteria for reprocessing (such as cleaning, disinfection, and packaging) of bag valve masks in the CSSD you work at? [Single-choice question] *

| ○ Yes |
| --- |
| ○ No |

1. Do you wish to be provided with technical guidelines for reprocessing (such as the cleaning, disinfection, quality inspection, and packaging) of bag valve masks? [Single-choice question] *

| ○ Yes |
| --- |
| ○ No |
